# Supplementary material for: Phospholipase D regulates the size of skeletal muscle cells through the activation of mTOR signaling
Source: PubMed Central journal article supplement (PMC3765503; doi:10.1186/1478-811x-11-55), 2013-08-02
Supplement: 1478-811X-11-55-S1.pdf [file 1478-811X-11-55-S1.pdf]

## Phospholipase D regulates the size of skeletal muscle cells through the activation of mTOR signaling

Rami Jaafar<sup>1</sup>, Joffrey De Larichaudy<sup>1</sup>, Stéphanie Chanon<sup>1</sup>, Vanessa Euthine<sup>1</sup>, Christine Durand<sup>1</sup>, Fabio Naro<sup>2</sup>, Philippe Bertolino<sup>3</sup>, Hubert Vidal<sup>1</sup>, Etienne Lefai<sup>1</sup>, Georges Némoz<sup>1</sup>

<sup>1</sup> Lyon 1 University, INSERM U1060, CarMeN Laboratory, Institut National de la Recherche Agronomique USC1235, F-69600 Oullins, France. <sup>2</sup> Istituto Interuniversitario di Miologia and Dipartimento di Istologia ed Embriologia Medica, Università di Roma-La Sapienza, 00161 Roma, Italy. <sup>3</sup> Centre de Recherche en Cancérologie de Lyon, INSERM U1052, CNRS UMR 5286, 69008 Lyon, France.

**A**

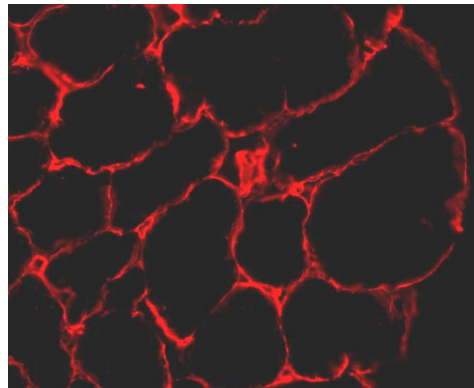

laminin labeling

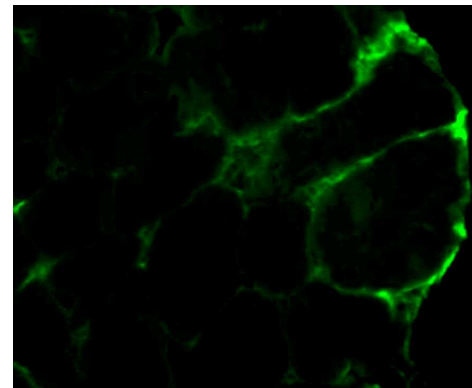

HA-PLD1 labeling

**B**

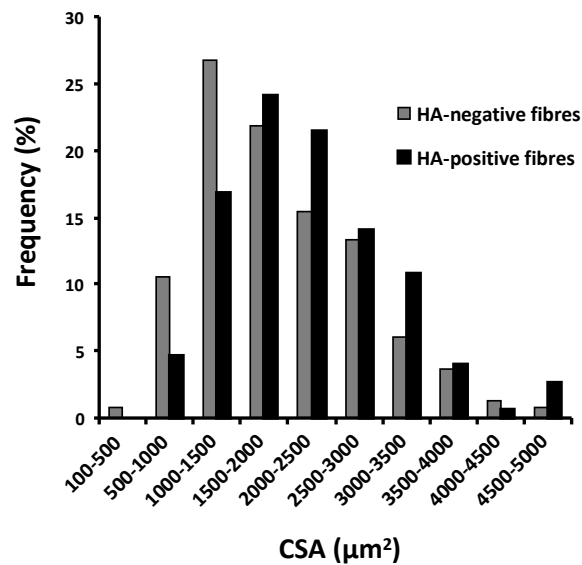

**Additional file 1. Comparison of the CSA of PLD1-expressing and non expressing fibres in PLD1 adenovirus-injected muscles.** (A) Muscle transversal sections were immuno-labeled for laminin and for HA-tagged PLD1. (B) The distributions of CSA of PLD1-expressing and non expressing fibres are shown.
