# Supplementary material for: Phospholipase D regulates the size of skeletal muscle cells through the activation of mTOR signaling
Source: PubMed Central journal article supplement (PMC3765503; doi:10.1186/1478-811x-11-55), 2013-08-02
Supplement: 1478-811X-11-55-S2.pdf [file 1478-811X-11-55-S2.pdf]

## Phospholipase D regulates the size of skeletal muscle cells through the activation of mTOR signaling

Rami Jaafar<sup>1</sup>, Joffrey De Larichaudy<sup>1</sup>, Stéphanie Chanon<sup>1</sup>, Vanessa Euthine<sup>1</sup>, Christine Durand<sup>1</sup>, Fabio Naro<sup>2</sup>, Philippe Bertolino<sup>3</sup>, Hubert Vidal<sup>1</sup>, Etienne Lefai<sup>1</sup>, Georges Némoz<sup>1</sup>

<sup>1</sup> Lyon 1 University, INSERM U1060, CarMeN Laboratory, Institut National de la Recherche Agronomique USC1235, F-69600 Oullins, France. <sup>2</sup> Istituto Interuniversitario di Miologia and Dipartimento di Istologia ed Embriologia Medica, Università di Roma-La Sapienza, 00161 Roma, Italy. <sup>3</sup> Centre de Recherche en Cancérologie de Lyon, INSERM U1052, CNRS UMR 5286, 69008 Lyon, France.

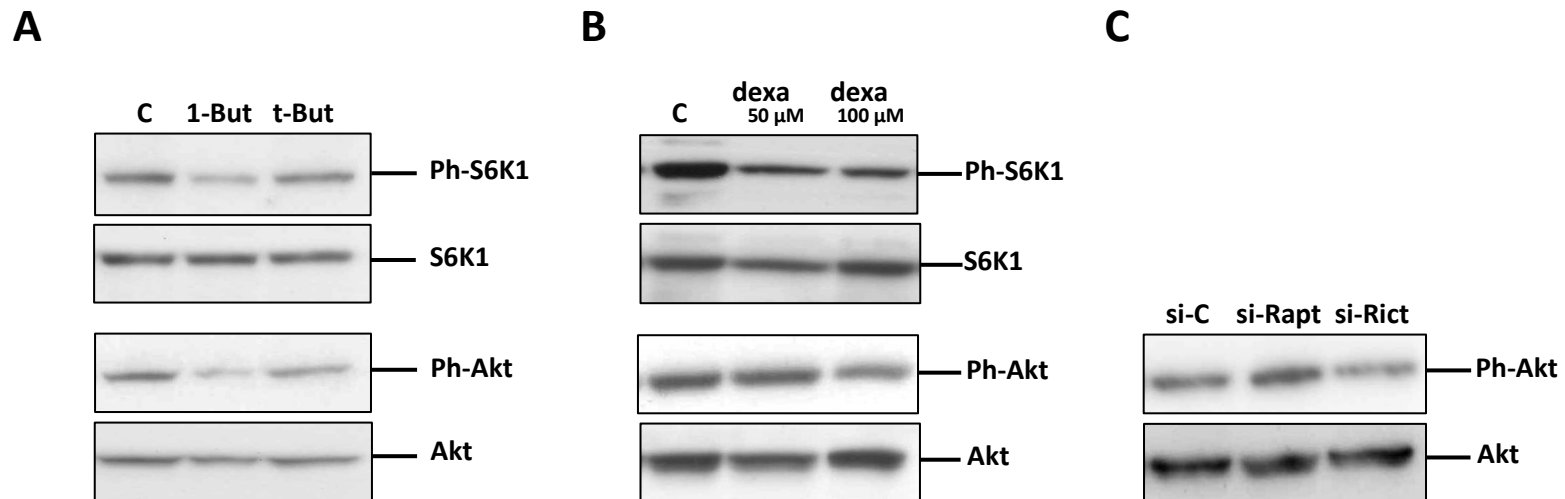

### Additional file 2. Effects of various agents on the phosphorylation of mTORC1 substrate S6K1 and mTORC2 substrate Akt.

(A) Myotubes were treated for 2 days with 0.1% 1-butanol or 0.1% t-Butanol as a control. (B) Myotubes were left untreated, or treated for 2 days with 50  $\mu$ M or 100  $\mu$ M dexamethasone. (C) Myotubes were transfected for 2 days with control siRNA (si-C), or siRNA directed against Raptor (si-Rapt), or Rictor (si-Rict). Phospho-Thr389/412-S6K1, total S6K1, Ph-Ser473-Akt, total Akt, were then detected by immunoblotting.
